# Supplementary material for: Electrical conductivity relaxation of Sr2Fe1.5Mo0.5O6−δ–Sm0.2Ce0.8O1.9dual-phase composites
Source: Royal Society of Chemistry journal article supplement (doi:10.1039/c3ta12787g), 2013-10-25
Supplement: c3ta12787g.pdf [file c3ta12787g.pdf]

## Supplementary Information

Table S1 Values of  $k_{\text{eff}}$ ,  $k_{\text{III}}$ ,  $\Lambda$ , and  $\Omega_{\text{III}}$  obtained from fitting data of electrical conductivity relaxation for SFM-SDC composites. Values are given for different SDC phase volume fractions ( $f_{\text{SDC}}^{\text{V}}$ ) and  $p\text{O}_2$  steps. Values of  $\Omega_{\text{III}}$  were calculated using Eq. 12.

| $f_{\text{SDC}}^{\text{V}}$<br>/- | $p\text{O}_2 : 0.01 \rightarrow 0.1 \text{ atm}$ |                                                           |                                                  |                 |                             | $p\text{O}_2 : 0.1 \rightarrow 1 \text{ atm}$    |                                                           |                                                  |                 |                             |
|-----------------------------------|--------------------------------------------------|-----------------------------------------------------------|--------------------------------------------------|-----------------|-----------------------------|--------------------------------------------------|-----------------------------------------------------------|--------------------------------------------------|-----------------|-----------------------------|
|                                   | $k_{\text{eff}}$<br>/ $10^{-7} \text{ m s}^{-1}$ | Error of $k_{\text{eff}}$<br>/ $10^{-9} \text{ m s}^{-1}$ | $k_{\text{III}}$<br>/ $10^{-7} \text{ m s}^{-1}$ | $\Lambda$<br>/- | $\Omega_{\text{III}}$<br>/- | $k_{\text{eff}}$<br>/ $10^{-7} \text{ m s}^{-1}$ | Error of $k_{\text{eff}}$<br>/ $10^{-9} \text{ m s}^{-1}$ | $k_{\text{III}}$<br>/ $10^{-7} \text{ m s}^{-1}$ | $\Lambda$<br>/- | $\Omega_{\text{III}}$<br>/- |
| 0                                 | 1.24                                             | 0.0264                                                    | 0                                                | 1.00            | 0                           | 3.67                                             | 0.153                                                     | 0                                                | 1.00            | 0                           |
| 0.105                             | 5.87                                             | 0.213                                                     | 4.75                                             | 5.26            | 0.810                       | 14.1                                             | 0.742                                                     | 10.8                                             | 4.28            | 0.766                       |
| 0.223                             | 9.77                                             | 1.06                                                      | 8.75                                             | 9.62            | 0.906                       | 21.7                                             | 4.06                                                      | 18.7                                             | 7.26            | 0.862                       |
| 0.353                             | 6.68                                             | 0.288                                                     | 5.83                                             | 7.83            | 0.872                       | 17.2                                             | 4.11                                                      | 14.6                                             | 6.83            | 0.854                       |
| 0.501                             | 9.45                                             | 11.4                                                      | 8.74                                             | 13.2            | 0.924                       | 21.0                                             | 5.85                                                      | 18.9                                             | 9.94            | 0.899                       |
| 0.667                             | 7.00                                             | 0.429                                                     | 6.58                                             | 17.0            | 0.941                       | 16.8                                             | 4.53                                                      | 15.6                                             | 13.8            | 0.928                       |

5

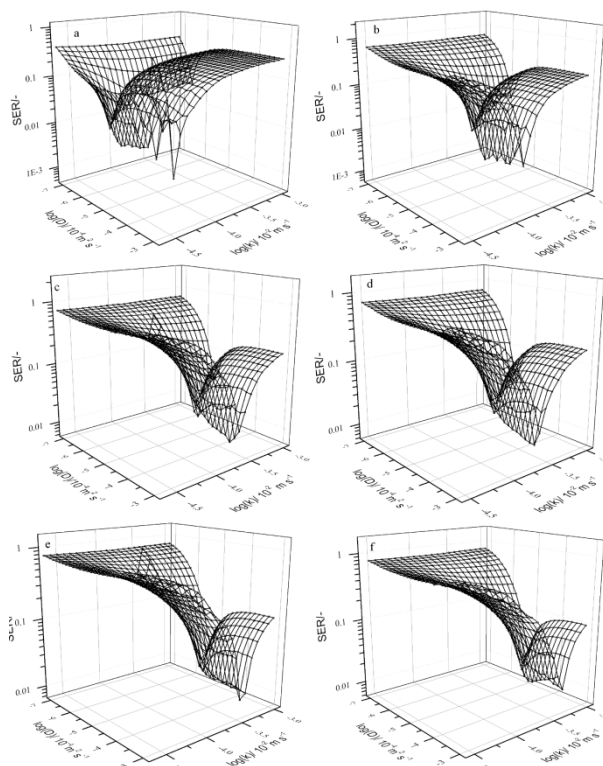

Fig. S1 Standard error plots of  $k$  and  $D$ . Plotted is the standard error of regression (SER), while varying  $k$  in the range  $10^{-5} \sim 10^{-3} \text{ cm}^2 \text{ s}^{-1}$  and  $D$  in the range  $10^{-7} \sim 10^{-3} \text{ cm}^2 \text{ s}^{-1}$ . Shown are data for SDC phase volume fractions,  $f_{\text{SDC}}^{\text{V}}$ : a) 0, b) 0.105, c) 0.223, d) 0.353, e) 0.501 and f) 0.667. The  $p\text{O}_2$  step change is from 0.1 atm to 1 atm.
